# Supplementary material for: Effects of post-transfer annealing and substrate interactions on the photoluminescence of 2D/3D monolayer WS2/Ge heterostructures
Source: Royal Society of Chemistry journal article supplement (doi:10.1039/d3nr00961k), 2023-01-01
Supplement: d3nr00961k1.pdf [file d3nr00961k1.pdf]

Supporting Information for

# Effects of Post-Transfer Annealing and Substrate Interactions on the Photoluminescence of 2D/3D Monolayer WS<sub>2</sub>/Ge Heterostructures

*Tianyi Zhang<sup>1,2#</sup>, Andrew Voshell<sup>3#</sup>, Da Zhou<sup>2,4#</sup>, Zachary D. Ward<sup>5</sup>, Zhuohang Yu<sup>1,2</sup>, Mingzu Liu<sup>2,4</sup>, Kevin O. Díaz Aponte<sup>3</sup>, Tomotaroh Granzier-Nakajima<sup>2,4</sup>, Yu Lei<sup>2,4,6</sup>, He Liu<sup>2,7</sup>, Humberto Terrones<sup>5</sup>, Ana Laura Elías<sup>8</sup>, Mukti Rana<sup>3\*</sup>, Mauricio Terrones<sup>1,2,4,7\*</sup>*

\*Corresponding author: Mauricio Terrones, mut11@psu.edu; Mukti Rana, mrana@desu.edu

#These authors contributed equally to the work

<sup>1</sup>Department of Materials Science and Engineering, The Pennsylvania State University, University Park, PA 16802, USA

<sup>2</sup>Center for 2-Dimensional and Layered Materials, The Pennsylvania State University, University Park, PA 16802, USA

<sup>3</sup>Division of Physics, Engineering, Mathematics and Computer Sciences and Optical Science Center for Applied Research, Delaware State University, Dover, DE 19901, USA

<sup>4</sup>Department of Physics, The Pennsylvania State University, University Park, PA 16802, USA

<sup>5</sup>Department of Physics, Applied Physics and Astronomy, Rensselaer Polytechnic Institute, Troy, NY 12180, USA

<sup>6</sup>Institute of Materials Research, Tsinghua Shenzhen International Graduate School, Tsinghua University, Shenzhen 518055, China

<sup>7</sup>Department of Chemistry, The Pennsylvania State University, University Park, PA 16802, USA

<sup>8</sup>Department of Physics, Binghamton University, Binghamton, NY 13902, USA

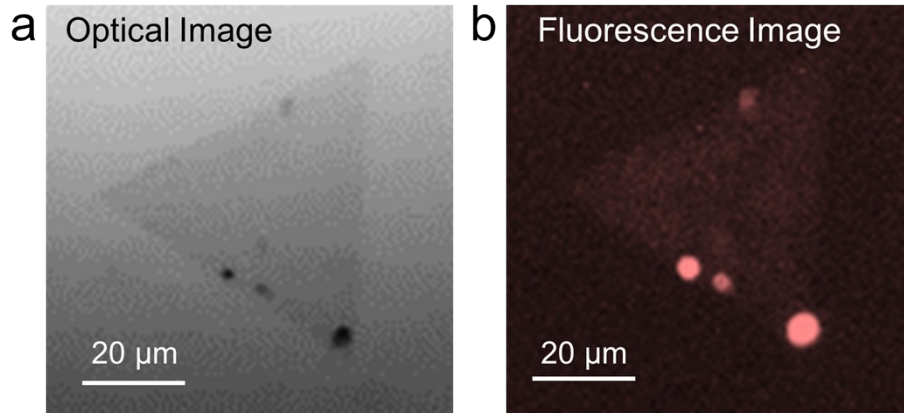

**Figure S1. Typical (a) optical and (b) fluorescence images of monolayer WS<sub>2</sub>/Ge heterostructures.** A weak fluorescence emission intensity is observed in WS<sub>2</sub>/Ge

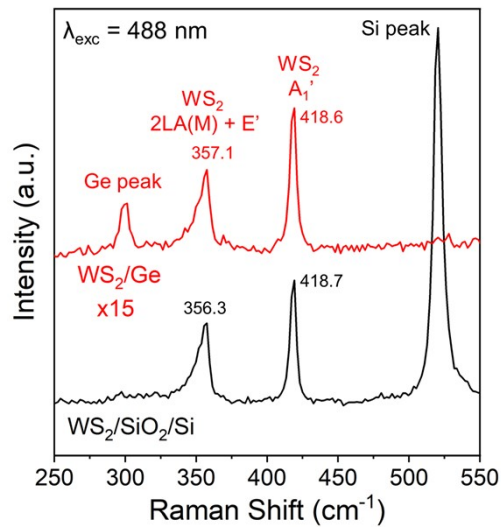

heterostructures.

**Figure S2. Raman spectra of as-grown WS<sub>2</sub> on SiO<sub>2</sub>/Si and WS<sub>2</sub>/Ge (annealed) obtained with a 488 nm laser.** Note that WS<sub>2</sub>/Ge heterostructures display a much weaker Raman signal, and the corresponding Raman spectrum data (red) is multiplied by 15 for visualization.

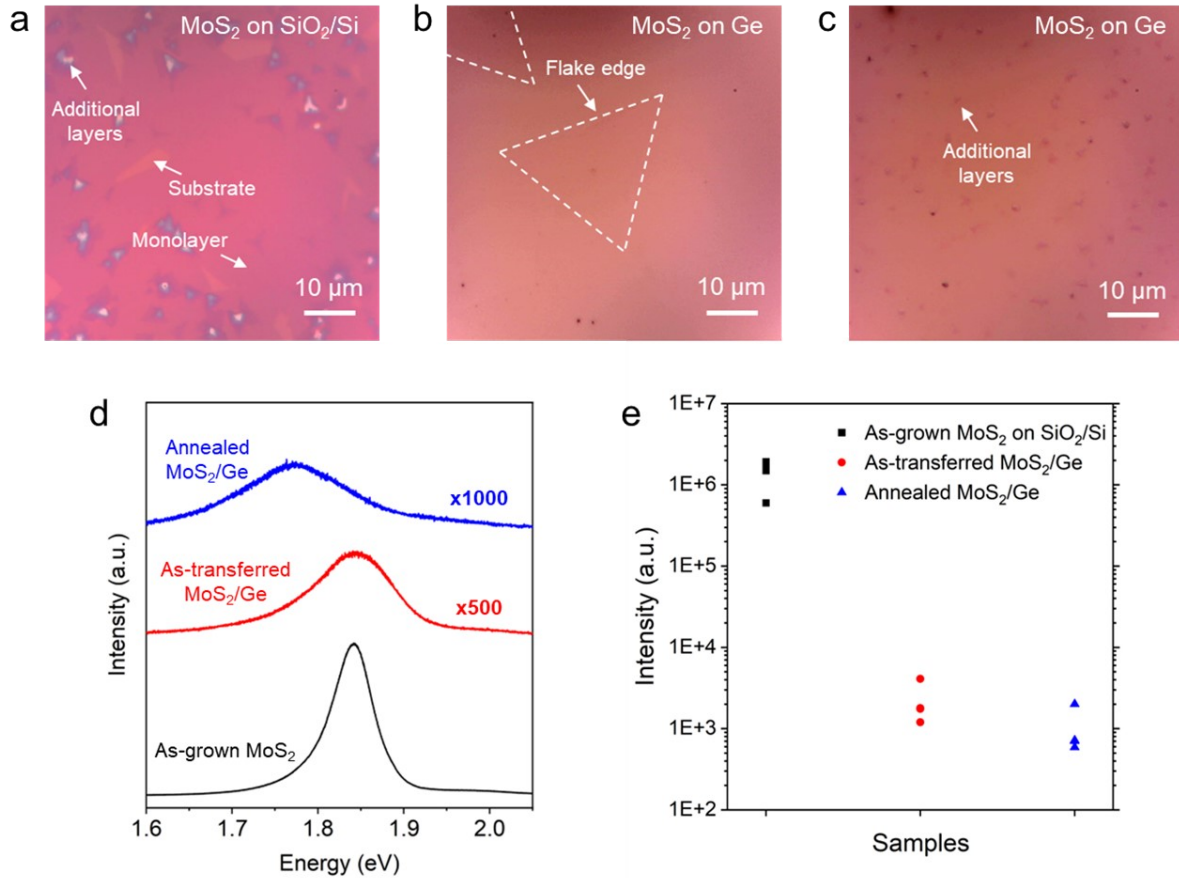

**Figure S3. PL studies of MoS<sub>2</sub>/Ge heterostructures and effects of post-transfer annealing, in which the monolayer MoS<sub>2</sub> is grown on SiO<sub>2</sub>/Si by CVD and then transferred to Ge.** (a) Optical image of as-grown monolayer MoS<sub>2</sub> on SiO<sub>2</sub>/Si. The monolayer MoS<sub>2</sub>, bare substrate, and additional MoS<sub>2</sub> layer regions are distinguished by optical contrast and marked by white arrows. (b) Optical image of typical MoS<sub>2</sub> flakes transferred on Ge. (c) Optical image of continuous films of monolayer MoS<sub>2</sub> on Ge. MoS<sub>2</sub> monolayers exhibit low optical contrast on Ge. (d) A comparison of PL spectra of as-grown monolayer MoS<sub>2</sub>, as-transferred MoS<sub>2</sub>/Ge, and annealed MoS<sub>2</sub>/Ge. MoS<sub>2</sub>/Ge heterostructures display prominent PL intensity quenching compared to as-grown MoS<sub>2</sub>. (e) A plot of PL intensity distributions of the samples investigated in (d). For each case, four random spots are measured, so that the spatial variation of PL intensity is taken into account.

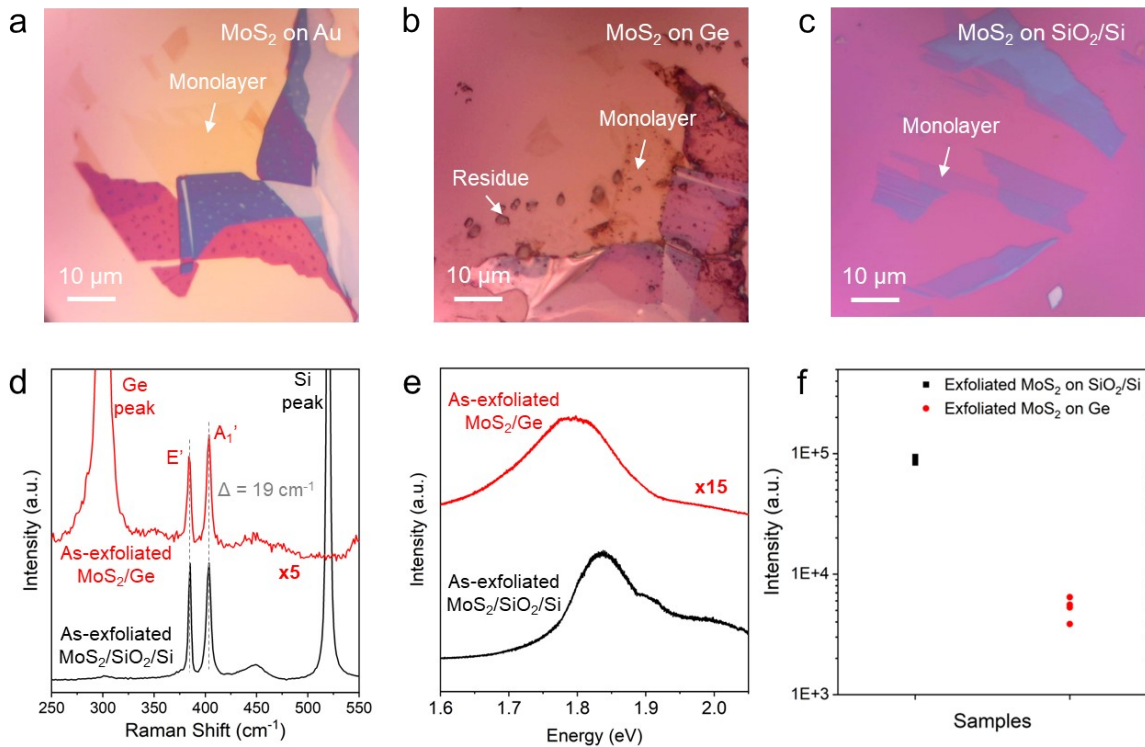

**Figure S4. PL studies of MoS<sub>2</sub>/Ge heterostructures obtained by exfoliating monolayer MoS<sub>2</sub> on Ge.** Considering the very low optical contrast of TMD monolayers on Ge, a previously reported gold (Au)-assisted approach was adopted to increase the exfoliation yield and aid the identification of monolayers.<sup>1</sup> **(a)** Optical image of a MoS<sub>2</sub> flake exfoliated on a gold tape (consisting of Au(150 nm)/PMMA/thermal release tape (TRT)), in which the monolayer region can be distinguished based on optical contrast. **(b)** Optical image of the identical flake transferred onto Ge. The monolayer MoS<sub>2</sub> region can be determined by comparing this optical image with (a). **(c)** Optical image of a monolayer MoS<sub>2</sub> exfoliated on SiO<sub>2</sub>/Si. **(d)** Raman spectra of exfoliated MoS<sub>2</sub>/SiO<sub>2</sub>/Si and MoS<sub>2</sub>/Ge. The monolayer nature of these flakes can be verified by the separation ( $\sim 19\text{ cm}^{-1}$ ) between E' and A<sub>1</sub>' Raman modes.<sup>2,3</sup> **(e)** A comparison of PL spectra of exfoliated MoS<sub>2</sub>/SiO<sub>2</sub>/Si and MoS<sub>2</sub>/Ge. It should be noted that we were not able to obtain the PL spectra of annealed MoS<sub>2</sub>/Ge, as our current exfoliation approach resulted in surface residue on both the MoS<sub>2</sub> flakes and Ge substrate. The residue seemed to be aggregated on top of the MoS<sub>2</sub> flake during the annealing process, hindering further optical characterizations. Future work is required to improve

our exfoliation technique in order to study the exfoliated MoS<sub>2</sub>/Ge heterostructures in detail. **(f)** A plot of PL intensity distributions of the samples investigated in (e). For each case, four random spots are measured, so that the spatial variation of PL intensity is taken into account.

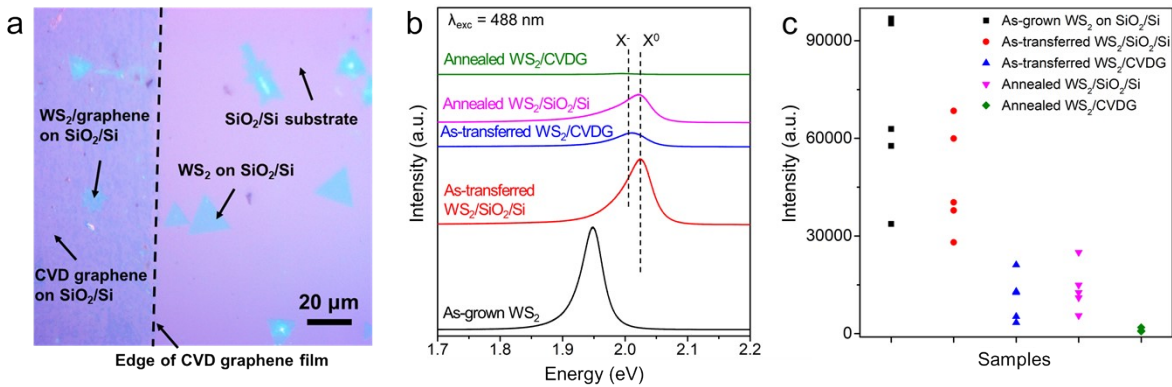

**Figure S5. Effects of post-transfer annealing on the PL intensity and uniformity of WS<sub>2</sub>/SiO<sub>2</sub>/Si and WS<sub>2</sub>/CVD-grown monolayer graphene (CVDG)/SiO<sub>2</sub>/Si heterostructures.**

**(a)** Optical image of monolayer WS<sub>2</sub> transferred on CVDG/SiO<sub>2</sub>/Si. The left side of the SiO<sub>2</sub>/Si substrate is covered with CVDG (purple colored region) while the right side of the substrate is without CVDG. Thus, both WS<sub>2</sub>/SiO<sub>2</sub>/Si and WS<sub>2</sub>/CVDG/SiO<sub>2</sub>/Si can be found and measured within this sample. **(b)** A comparison of PL spectra of as-grown monolayer WS<sub>2</sub>, as-transferred WS<sub>2</sub>/SiO<sub>2</sub>/Si, annealed WS<sub>2</sub>/SiO<sub>2</sub>/Si, as-transferred WS<sub>2</sub>/CVDG/SiO<sub>2</sub>/Si, and annealed WS<sub>2</sub>/CVDG/SiO<sub>2</sub>/Si. **(c)** A plot of PL intensity distributions of the samples investigated in (b). For each case, five random spots are measured, so that the spatial variation of PL intensity is taken into account. The results indicate a consistent PL intensity quenching and uniformity improvement after the low-pressure Ar/H<sub>2</sub> annealing process.

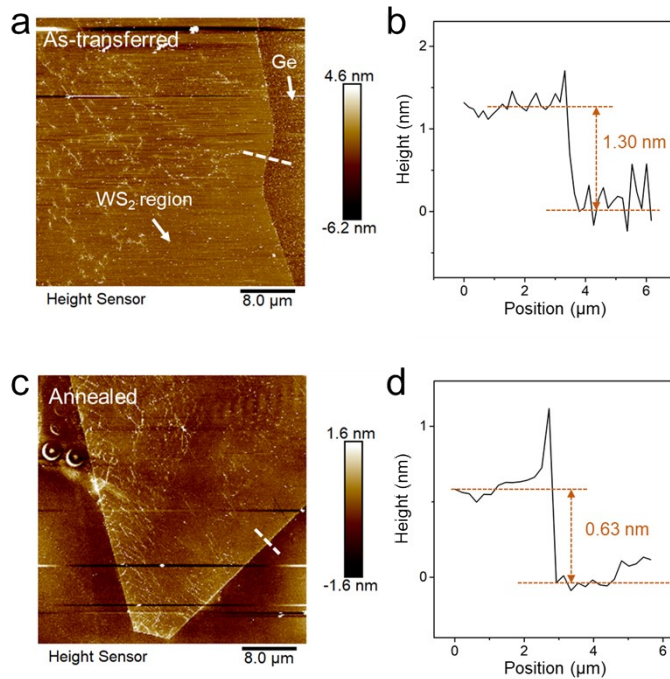

**Figure S6. Additional AFM data of as-transferred and annealed WS<sub>2</sub>/Ge heterostructures, which were obtained from different flakes with the data presented in Figures 2e-h. (a)** AFM topography image of as-transferred WS<sub>2</sub>/Ge and **(b)** the corresponding surface height profile along the white dashed line in (a). **(c)** AFM topography image of annealed WS<sub>2</sub>/Ge and **(d)** the corresponding surface height profile along the white dashed line in (c). The reduction of WS<sub>2</sub>/Ge

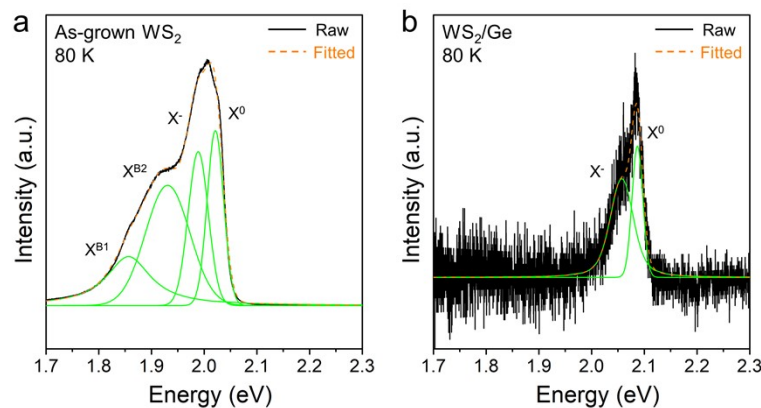

distance is consistently observed.

**Figure S7. PL spectra of as-grown WS<sub>2</sub> and WS<sub>2</sub>/Ge heterostructures measured at 80 K. The spectra were deconvoluted and exciton species were determined by peak fitting using Voigt**

profiles. Individual peaks are plotted with green solid lines, while the cumulative fitted spectra are plotted with orange dashed lines.

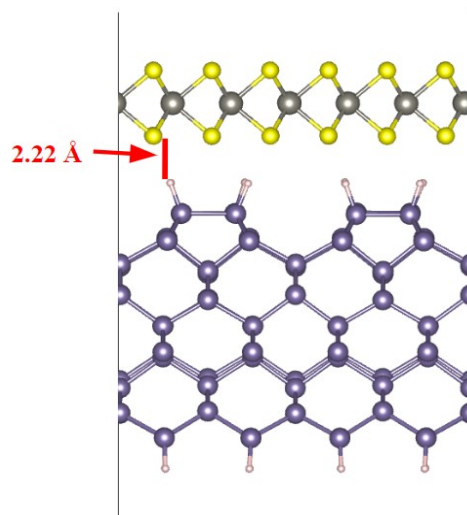

**Figure S8. DFT-calculated structure of WS<sub>2</sub>/H-Ge(100).** The distance between the topmost H atoms and topmost S atoms is calculated to be 2.22 Å.

## References

1. F. Liu, W. Wu, Y. Bai, S. H. Chae, Q. Li, J. Wang, J. Hone and X. Y. Zhu, *Science*, 2020, **367**, 903-906.
2. C. Lee, H. Yan, L. E. Brus, T. F. Heinz, J. Hone and S. Ryu, *ACS Nano*, 2010, **4**, 2695-2700.
3. M. Buscema, G. A. Steele, H. S. J. van der Zant and A. Castellanos-Gomez, *Nano Research*, 2014, **7**, 561-571.
